# Supplementary material for: Searching for Novel Cdk5 Substrates in Brain by Comparative Phosphoproteomics of Wild Type and Cdk5−/− Mice
Source: PLOS journal article supplement (doi:10.1371/journal.pone.0090363), 2014-03-21
Supplement: S1 (10.1371/journal.pone.0090363.s001) [file journal.pone.0090363.s001]

| Protein                                            | Gene    | Localization                                                                                   | Technique | PMID     |
|----------------------------------------------------|---------|------------------------------------------------------------------------------------------------|-----------|----------|
| 40S ribosomal protein S3                           | Rps3    | Pyramidal cells of hippocampus and dentate gyrus of adult brain                                | IHC       | 22274408 |
| Abl interactor 1                                   | Abi1    | Synaptosomes of adult brain and growth cones of neonatal brain                                 | WB        | 10995551 |
| Alpha-adducin                                      | Add1    | Dendritic spines of cultured hippocampal neurons                                               | ICC       | 9679146  |
| APC membrane recruitment protein 2                 | Amer2   | Strongly expressed in neurons of central and peripheral nervous system                         | ISH       | 20503382 |
| Bcl-2-associated transcription factor 1            | Bclaf1  |                                                                                                |           | N/A      |
| Calmodulin-regulated spectrin-associated protein 1 | Camsap1 | Microtubule-associated pattern in cerebellar granule cells. Not evaluated in other brain cells | ICC       | 19508979 |
| Calmodulin-regulated spectrin-associated protein 3 | Camsap3 |                                                                                                |           | N/A      |
| Clathrin coat assembly protein AP180               | Snap91  | Clathrin-coated vesicles and plasma membrane of synaptic compartments                          | EM        | 18842885 |
| Collapsin response mediator protein 1              | Dpysl1  | Soma, dendrites and axons of embryonic cortical neurons                                        | ICC       | 22378692 |
| Collapsin response mediator protein 2              | Dpysl2  | Soma, dendrites and axons of embryonic cortical neurons                                        | ICC       | 22378692 |
| Collapsin response mediator protein 4              | Dpysl3  | Soma, dendrites and axons of embryonic cortical neurons                                        | ICC       | 12745088 |
| DNA ligase 1                                       | Lig1    |                                                                                                |           | N/A      |
| E3 ubiquitin-protein ligase TRIM2                  | Trim2   | Soma and neurites of unpolarized hippocampal neurons. Excluded for axon in mature neurons      | ICC       | 20796172 |
| G protein-regulated inducer of neurite outgrowth 1 | Gprn1   | Highly enriched in growth cones                                                                | WB, ICC   | 10480904 |
| Growth-associated protein 43                       | Gap43   | Neuron-specific expression. Highly enriched in growth cones and synaptosomal plasma membranes  | IHC       | 441300   |
| Hepatoma-derived growth factor                     | Hdgf    | Mainly expressed in neurons and localized in nucleus                                           | IHC       | 15140875 |
| Heterogeneous nuclear ribonucleoprotein D0         | Hnrnpd  | Purkinje and granular cells of postnatal cerebellum. Not determined in other areas.            | IHC       | 19115409 |
| Kinesin light chain 1                              | Klc1    | Axon of hippocampal neurons                                                                    | ICC       | 22582169 |
| MARCKS-related protein                             | Marcks1 | Hippocampal and cortical neurons in culture                                                    | WB        | 22751924 |
| Microtubule-associated protein 1B                  | Map1b   | Neuron-specific expression. Present in soma, dendrites and axons                               | IHC       | 2562784  |
| Microtubule-associated protein 2                   | Map2    | Highly expressed in differentiated neurons                                                     | ICC       | 7001466  |
| Microtubule-associated protein tau                 | Mapt    | Neuron-specific expression. Axonal distribution.                                               | IHC       | 3930508  |

|                                                 |          |                                                                                                       |          |          |
|-------------------------------------------------|----------|-------------------------------------------------------------------------------------------------------|----------|----------|
| Myristoylated alanine-rich C-kinase substrate   | Marcks   | Small dendrites, axon and axon terminals                                                              | IHC, EM  | 2332803  |
| Na(+)/H(+) exchange regulatory cofactor NHE-RF1 | Slc9a3r1 | No evidence of neuronal expression. Weak expression in reactive astrocytes                            | IHC      | 19308292 |
| Nestin                                          | Nes      | Neuronal precursor cells                                                                              | ICC      | 2172829  |
| Neuronal migration protein doublecortin         | Dcx      | Widely expressed in migrating neurons. Microtubule-associated pattern                                 | IHC, ICC | 10399933 |
| Phosphatidylinositol 4-kinase beta              | Pi4kb    | Percaria and dendrites of hippocampal neurons. Not present in axons.                                  | ICC, EM  | 12244129 |
| Plakophilin-4                                   | Pkp4     | Protrusions of astrocytes                                                                             | WB, ICC  | 21858875 |
| Programmed cell death protein 4                 | Pdcd4    | Expressed in primary cortical neurons and developing cortex                                           | WB       | 22757755 |
| Protein SDE2 homolog                            | Sde2     |                                                                                                       |          | N/A      |
| Ras GTPase-activating protein-binding protein 1 | G3bp1    | Large granular structures in soma of hippocampal neurons and Purkinje cells                           | ICC, IHC | 23373770 |
| Ras GTPase-activating protein-binding protein 2 | G3bp2    |                                                                                                       |          | N/A      |
| Rho GTPase-activating protein 1                 | Arhgap1  |                                                                                                       |          | N/A      |
| RNA-binding protein Raly                        | Raly     |                                                                                                       |          | N/A      |
| SAFB-like transcription modulator               | Sltm     |                                                                                                       |          | N/A      |
| Serine/threonine-protein kinase DCLK1           | Dclk1    | Radially migrating neurons in cerebral cortex                                                         | IHC, ICC | 11124993 |
| Stathmin                                        | Stmn1    | Predominantly in soma and dendrites of cultured cortical neurons                                      | ICC      | 9452014  |
| Stathmin-2                                      | Scg10    | Neuron-specific expression. Highly concentrated in growth cones of developing neurons                 | ICC      | 3272176  |
| T-box brain protein 1                           | Tbr1     | Highly expressed in the nucleus of developing neurons. Synaptosomal localization in postnatal neurons | IHC      | 17329080 |
| U1 small nuclear ribonucleoprotein 70           | Snrnp70  |                                                                                                       |          | N/A      |

This Supplementary Table summarizes experimental evidences supporting neuronal distribution of putative Cdk5 new substrates identified in this study. The table shows the article where substrate was shown to be present in neurons (PMID column) and methodologies employed (Technique)

Grey cells indicate candidates experimentally validated in the present study
